# Supplementary material for: TRIM29 is Critical for Bladder Cancer Progression and Modulates the Tumor-Immune Niche
Source: Research Square preprint supplement (doi:10.21203/rs.3.rs-9214925/v1), 2026-05-20
Supplement: Supplementary file 1 [file 7482e1da874c1080b19da8be.docx]

**Supplemental Table 1: Primary antibodies (IHC)**

| Primary Antibody | Company/Cat # | Dilution |
| --- | --- | --- |
| CK5 | Abcam #ab53121 | 1:200 |
| CK14 (LL002) | Abcam #ab7800 | 1:800 |
| TRIM29 | Sigma #HPA020053 | 1:400 |
| STING | Cell Signaling #13647 | 1:100 |
| CD3 | Epredia #RM9107S | 1:200 |
| F4/80 | Bio-Rad #MCA497 | 1:300 |

**Supplemental Table 2: Primary antibodies (Western Blot)**

| Primary Antibody | Company/Cat # | Dilution | Secondary | Company/Cat # |
| --- | --- | --- | --- | --- |
| TRIM29 | Santa Cruz B-2 #sc-166707 | 1:1000 | 1:7000 | Secondary antibodies for western blotting (#926-68071 and #926-32210, LI-COR) |
| STING | Cell Signaling #13647 | 1:1000 | 1:7000 |
| pNF-κB p65 | Cell Signaling #3033 | 1:1000 | 1:7000 |
| NF-κB p65 | Cell Signaling #8242 | 1:1000 | 1:7000 |
| Β-actin | Sigma-Aldrich #A1978 | 1:1000 | 1:7000 |

**Supplemental Table 3: Mouse mIF Antibodies**

| **Antibody** | **Company** | **Catalog#** | **Species** | **Clone** | **Dilution** | **Incubation time** | **Opal TSA Fluorochrome** |
| --- | --- | --- | --- | --- | --- | --- | --- |
| FoxP3 | CST | 12653 | Rabbit | D6O8R | 1:100 | 60 | Opal 570 |
| CD206 | CST | 24595 | Rabbit | E6T5J | 1:100 | 60 | Opal 690 |
| CD8a | CST | 98941 | Rabbit | D4W2Z | 1:100 | 32 | Opal 520 |
| CD4 | CST | 25229 | Rabbit | D7D2Z | 1:100 | 60 | Opal 620 |
| TRIM29 | Sigma | HPA020053 | Rabbit | polyclonal | 1:250 | 60 | Opal 480 |
| CK (WSS) | AbCam | Ab9377 | Rabbit | polyclonal | 1:200 | 8 | Opal 780 |

**Supplemental Table 4: Human mIF Antibodies**

| **Antibody Panel H1** | **Company** | **Catalog#** | **Species** | **Clone** | **Dilution** | **Incubation time** | **Opal TSA Fluorochrome** |
| --- | --- | --- | --- | --- | --- | --- | --- |
| FoxP3 | AbCam | Ab20034 | Mouse | 236A/E7 | 1:100 | 32 | Opal 570 |
| CD3 | Ventana | 790-4341 | Rabbit | 2GV6 | RTU | 60 | Opal 620 |
| CD8 | Ventana | 790-4460 | Rabbit | SP57 | RTU | 20 | Opal 520 |
| STING | CST | 13647 | Rabbit | D2P2F | 1:100 | 8 | Opal 690 |
| TRIM29 | Sigma | HPA020053 | Rabbit | polyclonal | 1:250 | 60 | Opal 480 |
| CK (WSS) | AbCam | Ab9377 | Rabbit | polyclonal | 1:200 | 8 | Opal 780 |

| **Antibody Panel H2** | **Company** | **Catalog#** | **Species** | **Clone** | **Dilution** | **Incubation time** | **Opal TSA Fluorochrome** |
| --- | --- | --- | --- | --- | --- | --- | --- |
| FoxP3 | AbCam | Ab20034 | Mouse | 236A/E7 | 1:100 | 32 | Opal 570 |
| CD206 | CST | 24595 | Rabbit | E6T5J | 1:100 | 60 | Opal 690 |
| CD8 | Ventana | 790-4460 | Rabbit | SP57 | RTU | 20 | Opal 520 |
| CD4 | CST | 790-4423 | Rabbit | SP35 | RTU | 32 | Opal 620 |
| TRIM29 | Sigma | HPA020053 | Rabbit | polyclonal | 1:250 | 60 | Opal 480 |
| CK (WSS) | AbCam | Ab9377 | Rabbit | polyclonal | 1:200 | 8 | Opal 780 |

**Supplemental Table 5: Mouse Cell Phenotypes**

| **Phenotype** | **Marker Combination** |
| --- | --- |
| T-helper cells (Th) | CD4+/CD8-/FoxP3- |
| T-regulatory cells (Treg) | CD4+/CD8-/FoxP3+ |
| T-cytotoxic cells (CTL) | CD4-/CD8+/FoxP3- |
| Tumor-associated macrophages (M2) | CD206+ |

**Supplemental Table 6: Human Cell Phenotypes**

| **Phenotype** | **Marker Combination** |
| --- | --- |
| T-cells | CD3+/FOXP3- |
| T-helper cells (Th) | CD3+/CD8-/FOXP3- |
| CD8- T-regulatory cells (CD8- Treg) | CD3+/CD8-/FOXP3+ |
| Cytotoxic T-cell (CTL) | CD3+/CD8+/FOXP3- |
| CD8+ T-regulatory cells (CD8+ Treg) | CD3+/CD8+/FOXP3+ |

**Supplemental Table 7: qPCR Oligos**

| **Target** | **Forward primer (5’-3’)** | **Reverse primer (5’-3’)** |
| --- | --- | --- |
| β-actin | CGAGGCCCAGAGCAAGAGAG | CGGTTGGCCTTAGGGTTCAG |
| IFN-β | TCTCCTCCAAATTGCTCTCC | CTCCCATTCAATTGCCACAG |
| IL6 | ATTTGCCGAAGAGCCCTCAG | CCCCTGACCCAACCACAAAT |
| IL8 | GTGTGAAGGTGCAGTTTTGC | TGTGGTCCACTCTCAATCACTC |
| ISG15 | AGGCAGCGAACTCATCTTTG | GGACACCTGGAATTCGTTG |
| ISG54 | CGAACAGCTGAGAATTGCAC | TTCTCCCTCCATCAAGTTCC |
| ISG56 | CTAAGCAAAACCCTGCAGAAC | TCAGGCATTTCATCGTCATC |
| OAS1 | AGGAAAGGTGCTTCCGAGGTAG | GGACTGAGGAAGACAACCAGGT |
| OASL | GGGCTCGAGGACCTGAGGAT | GTGGCTGGGAGTTGGGAAGA |
| TNF-a | AGCCCATGTTGTAGCAAACC | AGGACCTGGGAGTAGATGAGG |
| GAPDH | GGTGGTCTCCTCTGACTTCAACA | GTTGCTGTAGCCAAATTCGTTGT |
| RIG I | CTTGGCATGTTACACAGCTGAC | GCTTGGGATGTGGTCTACTCA |
| MDA5 | ACATAACAGCAACATGGGCAGTG | TTTGGTAAGGCCTGAGCTGGAG |
| DHX29 | TCAGCACCTGGGAGCTACTT | TCTGCATCACTCCACTCCAG |
| cGAS | GGGAGCCCTGCTGTAACACTTCTTAT | CCTTTGCATGCTTGGGTACAAGGT |
| STING | ACTGTGGGGTGCCTGATAAC | TGGCAAACAAAGTCTGCAAG |
| IFI16 | CCGTTCATGACCAGCATAGG | TCAGTCTTGGTTTCAACGTGGT |
