# Supplementary material for: TRIM29 is Critical for Bladder Cancer Progression and Modulates the Tumor-Immune Niche
Source: Research Square preprint supplement (doi:10.21203/rs.3.rs-9214925/v1), 2026-05-20
Supplement: Supplementary file 2 [file 7c6c22346739136ac8836048.docx]

Supplemental Figure 1. TRIM29 expression is dynamically regulated during acute, chronic, and resolved inflammation. Representative urothelial TRIM29 IHC of mice exposed to BBN for 2 weeks (acute), 12 weeks (chronic), or 4 weeks followed by an 18-week withdrawal period without BBN. TRIM29 expression increased during acute exposure and was further elevated after chronic exposure, coinciding with progressive urothelial remodeling. Expression returned to near-baseline levels after prolonged recovery in the absence of BBN.

Supplemental Figure 2. *Trim29* WT cohorts display similar bladder weights and histology. (A) Bladder tumor weights from *Trim29* WT cohorts B-D. (B) Tumor invasive pathology frequencies for the three grouped *Trim29* WT cohorts exposed to BBN. Cohort B mice were administered tamoxifen chow but lack K5CreERT2 allele. Cohort C mice harbor K5CreERT2 but received regular chow. Cohort D mice lack K5CreERT2 and received regular chow.

Supplemental Figure 3. Heterogeneous Trim29 expression in muscle-invasive tumors from *Trim29* KO mice. Whole bladder H&E (left) and Trim29 IHC (right) images from three independent K5CreERT2; *Trim29*flox/flox mice administered tamoxifen and exposed to BBN. Despite Cre-mediated recombination, a subset of muscle-invasive tumors retained Trim29 expression (black arrows), indicating incomplete recombination.

Supplemental Figure 4. Incomplete *Trim29* KO produces adjacent tumors with differential Trim29 expression, immune infiltration, and invasiveness. (A) Bladder H&E demonstrating a muscle-invasive Trim29+ tumor (black arrows) adjacent to a non-muscle-invasive Trim29- tumor (white arrows) within the same K5CreERT2; *Trim29*flox/flox mouse administered tamoxifen and exposed to BBN. (B) TRIM29 IHC confirming Trim29 expression in the muscle-invasive tumor and complete *Trim29* KO in the adjacent non-muscle-invasive tumor. (C) STING IHC showing low Sting expression in the Trim29+ tumor and elevated Sting expression in the Trim29- tumor. (D-E) Cell type maps from mIF analysis illustrating immune cell infiltration in Trim29+ (D) and Trim29- (E) tumor regions. The Trim29- tumor demonstrates markedly higher infiltration of CD4+ T helper cells and M2-like macrophages compared to the immune-excluded Trim29+ tumor. (F) Quantification of tumor penetrating immune cell densities (cells/mm²).

Supplemental Figure 5. Human TRIM29low MIBC exhibits increased immune infiltration. mIF images from two deidentified human MIBC samples stained using the human antibody panel H2 (Sup. Table 4). Sample 1 (upper panels; TRIM29low) composite mIF staining from three representative tumor regions (1-3), tissue segmentation map showing tumor (blue) and stromal (green) compartments, and cell type maps. Sample 2 (bottom panels; TRIM29high) shows representative regions with reduced immune infiltration. Cell type maps display tumor cells (cyan), CD8+ cytotoxic T cells (green), CD4+ T helper cells (orange), and M2-like macrophages (red). Quantification of cell densities (cells/mm²) in the tumor compartment demonstrates significantly higher infiltration of M2 macrophages (**p<0.01), CD4+ Th cells, and CD8+ cytotoxic T cells (***p<0.001) in TRIM29low compared to TRIM29high tumors.

Supplemental Figure 6. Upregulated genes following TRIM29 KD in UM-UC14 human bladder cancer cells. Nascent RNA sequencing (Bru-seq) analysis identified several immune target genes significantly upregulated in TRIM29 KD compared to control cells.

Supplemental Figure 7. TRIM29 suppresses ISD-induced proinflammatory and IFN-stimulated gene expression. UM-UC5 and UM-UC14 *TRIM29* WT (blue) and KO (yellow) cells were transfected with interferon-stimulatory DNA (ISD), and mRNA expression of proinflammatory cytokines and ISGs was assessed by qRT-PCR at 9 and 16 hours post-transfection. Gene expression is shown relative to unstimulated controls. Data represent mean ± SEM of technical triplicates. Statistical comparisons between WT and KO were performed using one-way ANOVA to determine overall statistical significance and pairwise comparisons were conducted using Bonferroni-corrected t-tests. ns = not statistically significant; * p < 0.05; ** p < 0.01; *** p < 0.001. Results were considered statistically significant at p < 0.05.
